# Supplementary material
Source: MDPI journal article supplement (https://www.mdpi.com/2073-4395/13/3/703)
Supplement: s1 [file s1]

Additional file 1

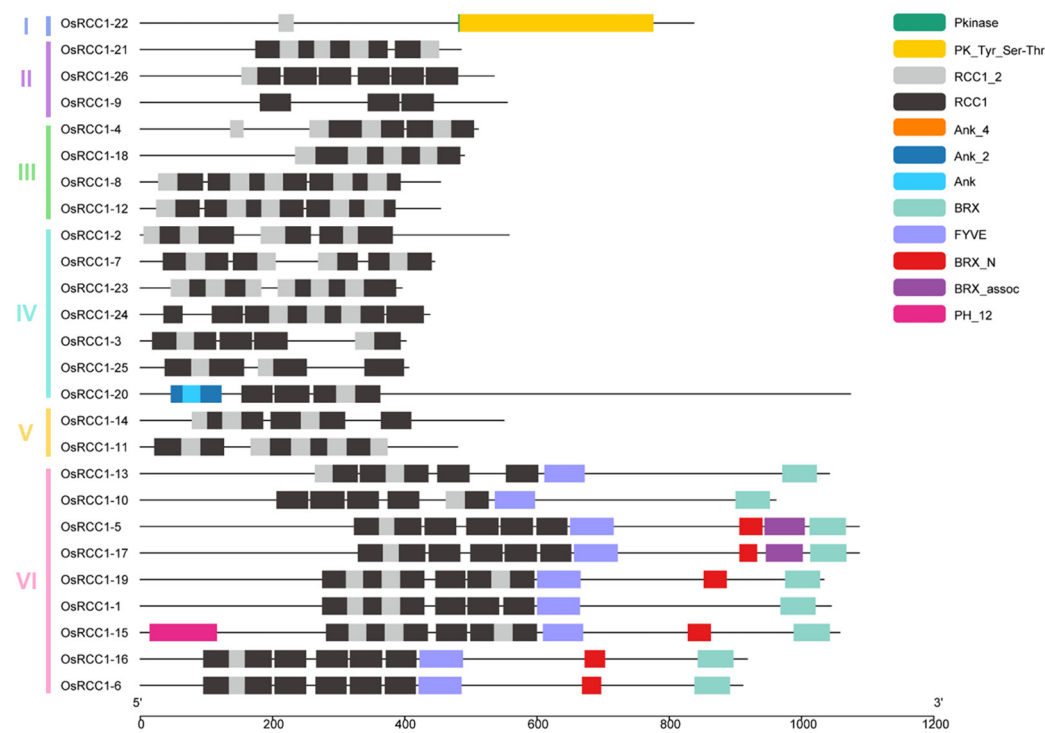

Figure S1. Domain distribution of OsRCC1s.

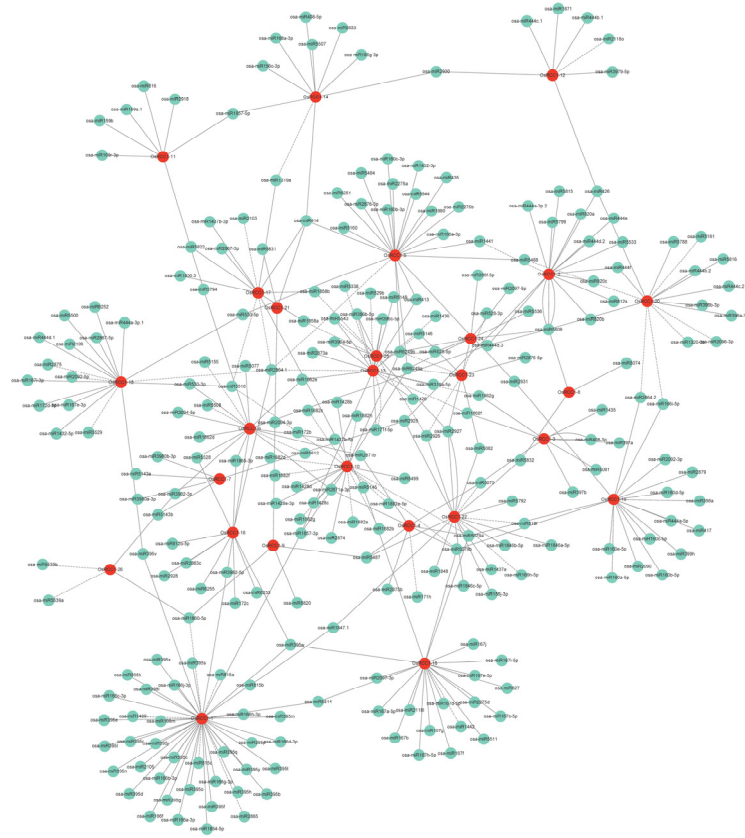

**Figure S2.** Network illustration of predicted miRNA-targeted *OsRCC1s*.

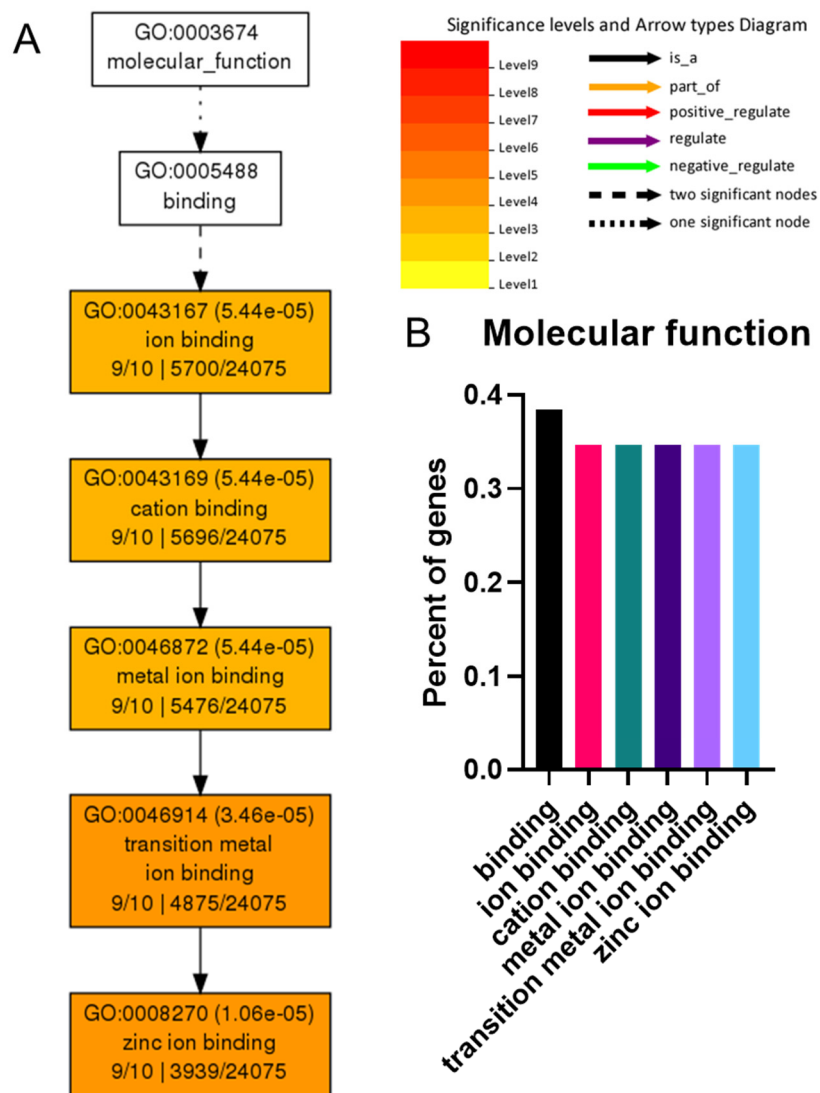

**Figure S3.** GO analysis of *OsRCC1s*. **(A)** GO analysis of *OsRCC1s* based on molecular functions. **(B)** Bar chart of enriched GO terms in *OsRCC1s* based on molecular functions.
