# Supplementary material
Source: MDPI journal article supplement (https://www.mdpi.com/2073-4395/13/3/703)
Supplement: s1 [file s1 › Supplementary Tables.xlsx]

## Sheet: Table S1
Table S1. Validation of the RCC1 domains using the HMMER Search tool.
OsRCC1s	Start	End	Pfam accseeion	Domain name	Bit score	Individual E-value	Conditional E-value
OsRCC1-1	275	323	PF00415.21	RCC1	37.73	2.5e-09	5e-13
OsRCC1-1	326	376	PF00415.21	RCC1	31.12	2.9e-07	5.8e-11
OsRCC1-1	381	430	PF00415.21	RCC1	45.81	7.3e-12	1.5e-15
OsRCC1-1	446	492	PF00415.21	RCC1	42.03	1.1e-10	2.3e-14
OsRCC1-1	495	543	PF00415.21	RCC1	28.82	1.5e-06	3.1e-10
OsRCC1-1	549	596	PF00415.21	RCC1	48.38	1.2e-12	2.4e-16
OsRCC1-1	313	337	PF13540.9	RCC1_2	28.87	7.7e-07	1.6e-10
OsRCC1-1	365	393	PF13540.9	RCC1_2	24.77	1.5e-05	3e-09
OsRCC1-1	968	1021	PF08381.14	BRX	86.43	6.3e-25	1.3e-28
OsRCC1-1	600	665	PF01363.24	FYVE	48.54	7.5e-13	1.5e-16
OsRCC1-2	21	72	PF00415.21	RCC1	51.36	1.4e-13	1.4e-17
OsRCC1-2	75	142	PF00415.21	RCC1	28.01	2.7e-06	2.7e-10
OsRCC1-2	210	258	PF00415.21	RCC1	50.88	1.9e-13	2e-17
OsRCC1-2	271	318	PF00415.21	RCC1	29.76	7.6e-07	7.7e-11
OsRCC1-2	322	382	PF00415.21	RCC1	29.16	1.2e-06	1.2e-10
OsRCC1-2	5	29	PF13540.9	RCC1_2	32.31	6.4e-08	6.5e-12
OsRCC1-2	60	88	PF13540.9	RCC1_2	37.5	1.5e-09	1.5e-13
OsRCC1-2	182	219	PF13540.9	RCC1_2	22.95	5.5e-05	5.6e-09
OsRCC1-2	307	329	PF13540.9	RCC1_2	27.65	1.9e-06	1.9e-10
OsRCC1-3	18	65	PF00415.21	RCC1	30.23	5.4e-07	5.5e-11
OsRCC1-3	68	115	PF00415.21	RCC1	58.75	6.7e-16	6.8e-20
OsRCC1-3	120	169	PF00415.21	RCC1	33.24	6.2e-08	6.4e-12
OsRCC1-3	172	223	PF00415.21	RCC1	23.61	6.3e-05	6.4e-09
OsRCC1-3	341	394	PF00415.21	RCC1	47.19	2.7e-12	2.8e-16
OsRCC1-3	55	81	PF13540.9	RCC1_2	31.64	1e-07	1.1e-11
OsRCC1-3	325	354	PF13540.9	RCC1_2	28.45	1e-06	1.1e-10
OsRCC1-4	273	348	PF00415.21	RCC1	34.01	3.6e-08	3.6e-12
OsRCC1-4	351	399	PF00415.21	RCC1	37.35	3.2e-09	3.3e-13
OsRCC1-4	403	454	PF00415.21	RCC1	50.85	2e-13	2e-17
OsRCC1-4	457	505	PF00415.21	RCC1	46.17	5.7e-12	5.8e-16
OsRCC1-4	136	156	PF13540.9	RCC1_2	23.19	4.7e-05	4.8e-09
OsRCC1-4	256	285	PF13540.9	RCC1_2	25.65	7.9e-06	8.1e-10
OsRCC1-4	335	364	PF13540.9	RCC1_2	29.55	4.7e-07	4.8e-11
OsRCC1-4	443	470	PF13540.9	RCC1_2	43.57	1.9e-11	1.9e-15
OsRCC1-5	323	371	PF00415.21	RCC1	37.82	2.3e-09	7e-13
OsRCC1-5	374	425	PF00415.21	RCC1	37.38	3.2e-09	9.7e-13
OsRCC1-5	430	478	PF00415.21	RCC1	43.65	3.5e-11	1.1e-14
OsRCC1-5	493	542	PF00415.21	RCC1	46.89	3.4e-12	1e-15
OsRCC1-5	545	594	PF00415.21	RCC1	30.6	4.1e-07	1.3e-10
OsRCC1-5	599	646	PF00415.21	RCC1	48.94	7.8e-13	2.4e-16
OsRCC1-5	1012	1067	PF08381.14	BRX	99.27	6.2e-29	1.9e-32
OsRCC1-5	361	384	PF13540.9	RCC1_2	31.33	1.3e-07	4e-11
OsRCC1-5	906	941	PF13713.9	BRX_N	61.36	5.5e-17	1.7e-20
OsRCC1-5	944	1005	PF16627.8	BRX_assoc	56.76	2.2e-15	6.6e-19
OsRCC1-5	650	716	PF01363.24	FYVE	49.93	2.8e-13	8.5e-17
OsRCC1-6	95	144	PF00415.21	RCC1	41.13	2.1e-10	5.4e-14
OsRCC1-6	148	199	PF00415.21	RCC1	37.06	4e-09	1e-12
OsRCC1-6	203	251	PF00415.21	RCC1	47.76	1.8e-12	4.6e-16
OsRCC1-6	265	312	PF00415.21	RCC1	42.59	7.4e-11	1.9e-14
OsRCC1-6	317	365	PF00415.21	RCC1	35.89	9.3e-09	2.4e-12
OsRCC1-6	370	417	PF00415.21	RCC1	53.77	2.4e-14	6.1e-18
OsRCC1-6	838	892	PF08381.14	BRX	99.93	3.8e-29	9.8e-33
OsRCC1-6	134	158	PF13540.9	RCC1_2	29.9	3.7e-07	9.3e-11
OsRCC1-6	668	697	PF13713.9	BRX_N	63.64	1.1e-17	2.7e-21
OsRCC1-6	421	486	PF01363.24	FYVE	50.42	2e-13	5e-17
OsRCC1-7	34	82	PF00415.21	RCC1	33.56	4.9e-08	5e-12
OsRCC1-7	85	133	PF00415.21	RCC1	43.26	4.6e-11	4.7e-15
OsRCC1-7	140	190	PF00415.21	RCC1	46.49	4.5e-12	4.6e-16
OsRCC1-7	285	329	PF00415.21	RCC1	25.04	2.3e-05	2.3e-09
OsRCC1-7	345	389	PF00415.21	RCC1	34.52	2.5e-08	2.5e-12
OsRCC1-7	392	441	PF00415.21	RCC1	47.82	1.7e-12	1.8e-16
OsRCC1-7	69	98	PF13540.9	RCC1_2	38.23	8.9e-10	9.1e-14
OsRCC1-7	177	205	PF13540.9	RCC1_2	29.51	4.8e-07	4.9e-11
OsRCC1-7	269	298	PF13540.9	RCC1_2	32.26	6.6e-08	6.7e-12
OsRCC1-7	377	404	PF13540.9	RCC1_2	29.9	3.7e-07	3.7e-11
OsRCC1-8	44	95	PF00415.21	RCC1	40.39	3.6e-10	3.7e-14
OsRCC1-8	102	149	PF00415.21	RCC1	57.24	2e-15	2e-19
OsRCC1-8	153	201	PF00415.21	RCC1	63.02	3.1e-17	3.2e-21
OsRCC1-8	204	252	PF00415.21	RCC1	56.27	4e-15	4.1e-19
OsRCC1-8	256	305	PF00415.21	RCC1	51.61	1.1e-13	1.2e-17
OsRCC1-8	308	357	PF00415.21	RCC1	64.35	1.2e-17	1.2e-21
OsRCC1-8	362	394	PF00415.21	RCC1	28.62	1.7e-06	1.8e-10
OsRCC1-8	27	56	PF13540.9	RCC1_2	26.93	3.1e-06	3.2e-10
OsRCC1-8	136	165	PF13540.9	RCC1_2	33.52	2.7e-08	2.7e-12
OsRCC1-8	188	216	PF13540.9	RCC1_2	31.28	1.3e-07	1.4e-11
OsRCC1-8	292	321	PF13540.9	RCC1_2	38.67	6.5e-10	6.6e-14
OsRCC1-8	344	373	PF13540.9	RCC1_2	39.68	3.1e-10	3.2e-14
OsRCC1-9	181	228	PF00415.21	RCC1	42.98	5.7e-11	5.8e-15
OsRCC1-9	344	392	PF00415.21	RCC1	30.63	4.1e-07	4.1e-11
OsRCC1-9	395	444	PF00415.21	RCC1	45.01	1.3e-11	1.3e-15
OsRCC1-10	206	254	PF00415.21	RCC1	39.47	7e-10	1.4e-13
OsRCC1-10	257	309	PF00415.21	RCC1	25.76	1.3e-05	2.7e-09
OsRCC1-10	313	361	PF00415.21	RCC1	40.62	3.1e-10	6.3e-14
OsRCC1-10	374	422	PF00415.21	RCC1	34.11	3.3e-08	6.8e-12
OsRCC1-10	478	527	PF00415.21	RCC1	54.07	1.9e-14	3.9e-18
OsRCC1-10	462	491	PF13540.9	RCC1_2	24.05	2.5e-05	5.1e-09
OsRCC1-10	900	952	PF08381.14	BRX	72.81	1.1e-20	2.3e-24
OsRCC1-10	536	597	PF01363.24	FYVE	49.92	2.8e-13	5.7e-17
OsRCC1-11	21	75	PF00415.21	RCC1	27.52	3.8e-06	3.9e-10
OsRCC1-11	78	127	PF00415.21	RCC1	55.33	7.8e-15	8e-19
OsRCC1-11	183	241	PF00415.21	RCC1	34.71	2.2e-08	2.2e-12
OsRCC1-11	244	296	PF00415.21	RCC1	45.72	7.9e-12	8e-16
OsRCC1-11	299	357	PF00415.21	RCC1	38.95	1e-09	1e-13
OsRCC1-11	62	91	PF13540.9	RCC1_2	30.67	2.1e-07	2.1e-11
OsRCC1-11	167	196	PF13540.9	RCC1_2	27.84	1.6e-06	1.6e-10
OsRCC1-11	228	257	PF13540.9	RCC1_2	36.55	3e-09	3.1e-13
OsRCC1-11	283	312	PF13540.9	RCC1_2	32.41	6e-08	6.1e-12
OsRCC1-11	348	374	PF13540.9	RCC1_2	24.79	1.5e-05	1.5e-09
OsRCC1-12	43	90	PF00415.21	RCC1	47.04	3.1e-12	3.1e-16
OsRCC1-12	97	144	PF00415.21	RCC1	58.23	9.8e-16	9.9e-20
OsRCC1-12	148	196	PF00415.21	RCC1	56.76	2.8e-15	2.9e-19
OsRCC1-12	199	247	PF00415.21	RCC1	56.94	2.5e-15	2.5e-19
OsRCC1-12	251	300	PF00415.21	RCC1	51.68	1.1e-13	1.1e-17
OsRCC1-12	303	351	PF00415.21	RCC1	61.06	1.3e-16	1.3e-20
OsRCC1-12	357	386	PF00415.21	RCC1	27.64	3.5e-06	3.5e-10
OsRCC1-12	24	53	PF13540.9	RCC1_2	22.88	5.8e-05	6e-09
OsRCC1-12	131	160	PF13540.9	RCC1_2	33.29	3.2e-08	3.2e-12
OsRCC1-12	183	211	PF13540.9	RCC1_2	31.28	1.3e-07	1.4e-11
OsRCC1-12	287	316	PF13540.9	RCC1_2	42.99	2.9e-11	2.9e-15
OsRCC1-12	339	368	PF13540.9	RCC1_2	33.66	2.4e-08	2.5e-12
OsRCC1-13	281	329	PF00415.21	RCC1	29.78	7.5e-07	1.5e-10
OsRCC1-13	332	384	PF00415.21	RCC1	22.69	0.00012	2.5e-08
OsRCC1-13	387	436	PF00415.21	RCC1	44.15	2.4e-11	4.9e-15
OsRCC1-13	449	498	PF00415.21	RCC1	35.07	1.7e-08	3.4e-12
OsRCC1-13	553	602	PF00415.21	RCC1	53.3	3.4e-14	6.9e-18
OsRCC1-13	264	291	PF13540.9	RCC1_2	25.99	6.2e-06	1.3e-09
OsRCC1-13	371	399	PF13540.9	RCC1_2	22.43	8.1e-05	1.6e-08
OsRCC1-13	971	1023	PF08381.14	BRX	81.01	3.1e-23	6.4e-27
OsRCC1-13	611	672	PF01363.24	FYVE	46.56	3.1e-12	6.4e-16
OsRCC1-14	88	137	PF00415.21	RCC1	56.9	2.5e-15	2.6e-19
OsRCC1-14	140	186	PF00415.21	RCC1	28.73	1.6e-06	1.6e-10
OsRCC1-14	197	256	PF00415.21	RCC1	34.57	2.4e-08	2.4e-12
OsRCC1-14	259	310	PF00415.21	RCC1	33.71	4.4e-08	4.5e-12
OsRCC1-14	364	410	PF00415.21	RCC1	26.65	7.1e-06	7.2e-10
OsRCC1-14	78	101	PF13540.9	RCC1_2	24	2.6e-05	2.7e-09
OsRCC1-14	124	153	PF13540.9	RCC1_2	29.03	6.8e-07	7e-11
OsRCC1-14	243	271	PF13540.9	RCC1_2	23.97	2.6e-05	2.7e-09
OsRCC1-15	281	328	PF00415.21	RCC1	37.19	3.6e-09	1.1e-12
OsRCC1-15	332	383	PF00415.21	RCC1	40.11	4.4e-10	1.4e-13
OsRCC1-15	386	435	PF00415.21	RCC1	48.72	9.1e-13	2.8e-16
OsRCC1-15	447	494	PF00415.21	RCC1	40.76	2.8e-10	8.5e-14
OsRCC1-15	499	548	PF00415.21	RCC1	32.17	1.3e-07	4.1e-11
OsRCC1-15	551	600	PF00415.21	RCC1	51.94	9e-14	2.7e-17
OsRCC1-15	988	1043	PF08381.14	BRX	98.05	1.5e-28	4.5e-32
OsRCC1-15	315	342	PF13540.9	RCC1_2	34.84	1e-08	3.2e-12
OsRCC1-15	370	398	PF13540.9	RCC1_2	23.94	2.7e-05	8.3e-09
OsRCC1-15	535	563	PF13540.9	RCC1_2	29.27	5.8e-07	1.8e-10
OsRCC1-15	828	863	PF13713.9	BRX_N	61.46	5.1e-17	1.6e-20
OsRCC1-15	609	670	PF01363.24	FYVE	48.13	1e-12	3.1e-16
OsRCC1-15	14	116	PF16457.8	PH_12	30.75	4e-07	1.2e-10
OsRCC1-16	95	144	PF00415.21	RCC1	44.82	1.5e-11	3.8e-15
OsRCC1-16	148	199	PF00415.21	RCC1	37.18	3.7e-09	9.3e-13
OsRCC1-16	203	251	PF00415.21	RCC1	42.9	6e-11	1.5e-14
OsRCC1-16	266	314	PF00415.21	RCC1	45.93	6.8e-12	1.7e-15
OsRCC1-16	317	366	PF00415.21	RCC1	31.15	2.8e-07	7.1e-11
OsRCC1-16	371	418	PF00415.21	RCC1	55.56	6.6e-15	1.7e-18
OsRCC1-16	843	897	PF08381.14	BRX	99.45	5.4e-29	1.4e-32
OsRCC1-16	134	158	PF13540.9	RCC1_2	30.73	2e-07	5.1e-11
OsRCC1-16	672	703	PF13713.9	BRX_N	58.77	3.5e-16	9e-20
OsRCC1-16	422	488	PF01363.24	FYVE	50.83	1.5e-13	3.7e-17
OsRCC1-17	329	377	PF00415.21	RCC1	39.76	5.7e-10	1.7e-13
OsRCC1-17	380	431	PF00415.21	RCC1	39.94	5e-10	1.5e-13
OsRCC1-17	436	484	PF00415.21	RCC1	44.69	1.6e-11	5e-15
OsRCC1-17	499	548	PF00415.21	RCC1	46.31	5.1e-12	1.6e-15
OsRCC1-17	551	600	PF00415.21	RCC1	28.22	2.3e-06	7e-10
OsRCC1-17	605	652	PF00415.21	RCC1	48.07	1.5e-12	4.4e-16
OsRCC1-17	1013	1068	PF08381.14	BRX	102.54	5.9e-30	1.8e-33
OsRCC1-17	367	391	PF13540.9	RCC1_2	30.16	3e-07	9.3e-11
OsRCC1-17	906	933	PF13713.9	BRX_N	53.99	1.1e-14	3.4e-18
OsRCC1-17	656	722	PF01363.24	FYVE	46.77	2.7e-12	8.2e-16
OsRCC1-17	946	1002	PF16627.8	BRX_assoc	44.1	1.9e-11	5.9e-15
OsRCC1-18	253	327	PF00415.21	RCC1	33.13	6.7e-08	6.8e-12
OsRCC1-18	330	378	PF00415.21	RCC1	39.4	7.4e-10	7.6e-14
OsRCC1-18	382	433	PF00415.21	RCC1	47.97	1.6e-12	1.6e-16
OsRCC1-18	436	484	PF00415.21	RCC1	50.06	3.5e-13	3.5e-17
OsRCC1-18	234	265	PF13540.9	RCC1_2	25.82	7e-06	7.1e-10
OsRCC1-18	314	343	PF13540.9	RCC1_2	30.02	3.4e-07	3.4e-11
OsRCC1-18	368	395	PF13540.9	RCC1_2	27.61	1.9e-06	1.9e-10
OsRCC1-18	423	449	PF13540.9	RCC1_2	41.36	9.3e-11	9.5e-15
OsRCC1-19	275	323	PF00415.21	RCC1	38.74	1.2e-09	3e-13
OsRCC1-19	326	376	PF00415.21	RCC1	30.46	4.6e-07	1.2e-10
OsRCC1-19	381	430	PF00415.21	RCC1	48.24	1.3e-12	3.3e-16
OsRCC1-19	446	492	PF00415.21	RCC1	46.77	3.7e-12	9.4e-16
OsRCC1-19	495	544	PF00415.21	RCC1	29.61	8.4e-07	2.2e-10
OsRCC1-19	549	596	PF00415.21	RCC1	48.46	1.1e-12	2.8e-16
OsRCC1-19	311	337	PF13540.9	RCC1_2	24.47	1.8e-05	4.7e-09
OsRCC1-19	365	393	PF13540.9	RCC1_2	23.65	3.3e-05	8.5e-09
OsRCC1-19	531	559	PF13540.9	RCC1_2	22.57	7.3e-05	1.9e-08
OsRCC1-19	975	1028	PF08381.14	BRX	88.35	1.6e-25	4.1e-29
OsRCC1-19	600	666	PF01363.24	FYVE	49.98	2.7e-13	6.8e-17
OsRCC1-19	852	887	PF13713.9	BRX_N	29.17	6.3e-07	1.6e-10
OsRCC1-20	153	200	PF00415.21	RCC1	35.7	1.1e-08	3.8e-12
OsRCC1-20	203	256	PF00415.21	RCC1	30.96	3.2e-07	1.1e-10
OsRCC1-20	262	309	PF00415.21	RCC1	43.24	4.7e-11	1.7e-14
OsRCC1-20	313	363	PF00415.21	RCC1	41.28	1.9e-10	6.8e-14
OsRCC1-20	296	325	PF13540.9	RCC1_2	24.6	1.7e-05	6e-09
OsRCC1-20	69	114	PF13637.9	Ank_4	31.72	1.8e-07	6.2e-11
OsRCC1-20	46	123	PF12796.10	Ank_2	31.02	3e-07	1.1e-10
OsRCC1-20	64	91	PF00023.33	Ank	18.67	0.0019	6.8e-07
OsRCC1-21	174	223	PF00415.21	RCC1	24.8	2.7e-05	2.7e-09
OsRCC1-21	226	276	PF00415.21	RCC1	58.51	8e-16	8.1e-20
OsRCC1-21	279	330	PF00415.21	RCC1	42.59	7.5e-11	7.6e-15
OsRCC1-21	334	374	PF00415.21	RCC1	33.52	5.1e-08	5.2e-12
OsRCC1-21	385	437	PF00415.21	RCC1	27.36	4.3e-06	4.3e-10
OsRCC1-21	211	239	PF13540.9	RCC1_2	34.79	1.1e-08	1.1e-12
OsRCC1-21	263	287	PF13540.9	RCC1_2	25.56	8.4e-06	8.6e-10
OsRCC1-21	317	345	PF13540.9	RCC1_2	29.55	4.7e-07	4.8e-11
OsRCC1-21	424	452	PF13540.9	RCC1_2	31.35	1.3e-07	1.3e-11
OsRCC1-22	481	719	PF00069.28	Pkinase	149.35	1.4e-43	2.8e-47
OsRCC1-22	483	776	PF07714.20	PK_Tyr_Ser-Thr	131.11	4.6e-38	9.4e-42
OsRCC1-22	209	232	PF13540.9	RCC1_2	22.63	7e-05	1.4e-08
OsRCC1-23	62	112	PF00415.21	RCC1	44.1	2.5e-11	2.6e-15
OsRCC1-23	115	172	PF00415.21	RCC1	37.01	4.1e-09	4.2e-13
OsRCC1-23	221	270	PF00415.21	RCC1	53.42	3.1e-14	3.2e-18
OsRCC1-23	273	323	PF00415.21	RCC1	65.32	5.9e-18	6e-22
OsRCC1-23	326	387	PF00415.21	RCC1	39.45	7.1e-10	7.3e-14
OsRCC1-23	46	74	PF13540.9	RCC1_2	28.16	1.3e-06	1.3e-10
OsRCC1-23	99	128	PF13540.9	RCC1_2	29.54	4.8e-07	4.8e-11
OsRCC1-23	159	183	PF13540.9	RCC1_2	32.56	5.3e-08	5.4e-12
OsRCC1-23	208	234	PF13540.9	RCC1_2	41.07	1.1e-10	1.2e-14
OsRCC1-23	258	285	PF13540.9	RCC1_2	33.23	3.3e-08	3.4e-12
OsRCC1-23	310	338	PF13540.9	RCC1_2	32.1	7.5e-08	7.6e-12
OsRCC1-24	35	64	PF00415.21	RCC1	22.11	0.00019	1.9e-08
OsRCC1-24	108	155	PF00415.21	RCC1	28.54	1.8e-06	1.9e-10
OsRCC1-24	158	207	PF00415.21	RCC1	37.16	3.7e-09	3.8e-13
OsRCC1-24	210	265	PF00415.21	RCC1	37.02	4.1e-09	4.2e-13
OsRCC1-24	268	317	PF00415.21	RCC1	53.63	2.7e-14	2.7e-18
OsRCC1-24	320	369	PF00415.21	RCC1	48.31	1.2e-12	1.2e-16
OsRCC1-24	372	429	PF00415.21	RCC1	34.93	1.8e-08	1.9e-12
OsRCC1-24	195	223	PF13540.9	RCC1_2	22.96	5.5e-05	5.6e-09
OsRCC1-24	252	279	PF13540.9	RCC1_2	34.83	1e-08	1.1e-12
OsRCC1-24	304	333	PF13540.9	RCC1_2	39.45	3.7e-10	3.8e-14
OsRCC1-25	37	88	PF00415.21	RCC1	30.68	3.9e-07	4e-11
OsRCC1-25	91	157	PF00415.21	RCC1	40.01	4.8e-10	4.9e-14
OsRCC1-25	194	252	PF00415.21	RCC1	35.41	1.3e-08	1.3e-12
OsRCC1-25	339	399	PF00415.21	RCC1	27.18	4.8e-06	4.9e-10
OsRCC1-25	77	104	PF13540.9	RCC1_2	31.23	1.4e-07	1.4e-11
OsRCC1-25	178	201	PF13540.9	RCC1_2	22.87	5.9e-05	6e-09
OsRCC1-26	164	212	PF00415.21	RCC1	42.83	6.3e-11	6.4e-15
OsRCC1-26	217	267	PF00415.21	RCC1	25.2	2e-05	2.1e-09
OsRCC1-26	270	319	PF00415.21	RCC1	23.07	9.4e-05	9.5e-09
OsRCC1-26	329	377	PF00415.21	RCC1	27.58	3.6e-06	3.7e-10
OsRCC1-26	380	429	PF00415.21	RCC1	53.02	4.1e-14	4.2e-18
OsRCC1-26	432	481	PF00415.21	RCC1	25.62	1.5e-05	1.5e-09
OsRCC1-26	153	177	PF13540.9	RCC1_2	27.64	1.9e-06	1.9e-10

## Sheet: Table S2
Table S2. Primers used in this study.
Primer name	Forward primer(5'-3')	Reverse primer(5'-3')	Gene ID
qRT-RCC1-2	GGCATCAACATCGGGAGTG	AGGGAACGTGGAAGTGTTCGT	LOC_Os01g52630
qRT-RCC1-3	AGACTAAATCCCGCCACAACA	TCTCCCAAACCAAGCTGTCC	LOC_Os01g56990
qRT-RCC1-5	CCTGGAGGAGTAACCAAGAATAGC	CAGCCCATTAGGACCATTTGA	LOC_Os01g72320
qRT-RCC1-8	ACACTCTTGCCCTGACAGAAGC	GCTGACATTGGGACGGCTTT	LOC_Os02g34860
qRT-RCC1-9	CTCCGATAACGGCGATACATAC	GTATGCGGGTATCCCATTTCT	LOC_Os02g38350
qRT-RCC1-12	TGGGCAAGTCGGAGTTGGTG	AAGTTGTCCGCTAGTACCCCTC	LOC_Os04g35570
qRT-RCC1-14	CAATGCACGATCTAACAAGCG	TGCGGCCACGTCTACCCTTA	LOC_Os04g56720
qRT-RCC1-17	GGAGCAGGACTGGTGAAGAAC	CCGTTTGAACAGGGTTCTCC	LOC_Os05g31920
qRT-RCC1-21	CTGACCGAGGATCATCCGACA	GTTTTAAGCACCCACGAATGTAC	LOC_Os07g27490
qRT-RCC1-23	CCGTGTTGAAGGATTATCTGACC	GGGTTCCTCCACATGATACCTG	LOC_Os08g33390
qRT-RCC1-26	GGGTCACGGTAATGAGGAATG	CCAACTCCGGGCTAAGGACA	LOC_Os12g18650
OsActin1	CCCTCCTGAAAGGAAGTACAGTGT	ACTCGTCGTACTCAGCCTTGG	LOC_Os03g50885
OsUBQ5	CTCGCCGACTACAACATCCA	TCTTGGGCTTGGTGTACGTCTT	LOC_Os01g22490

## Sheet: Table S3
Table S3. Motif sequences of RCC1s in rice.
No.	Motif sequence	Sites	Width	Domain
1	VACGTWHTAAVTSSGQLFTWGDGTYGQLGHGB	25	32	PF13540
2	FVVEVACGAYHSAALTSEGEVYTWGKGANGQLGHGD	25	36	PF13540
3	PKLVESLAGVNVVKVACGEYHTCAVTDDGDLYTWGDGTYGQ	26	41	PF13540
4	CGSNFTAAICJHKWVSGADQSVCSGCRQPFGFTRKRHNCYNCGLVHCHAC	9	50	PF01363
5	WIEQYEPGVYITLTTLPDGTKDLKRVRFSRKRFGEHQAEKWWNENRERVY	9	50	PF08381
6	KLFTWGDGDKGRLGHGDKESRLVPTCVAALIDYBFHQVACGHSLTVALTT	11	50	PF00415
7	IACGGRHSAAVTRQGEVYTWG	26	21	PF13540
8	ALKKGAHLLKYGRRGKPKFCPFRLSSDESTLIWYSKKKEKHLRLSSVSRV	7	50	Not Found
9	RESIAVPKEVESLKGLRTISVACGVWHTAAIVEVMVTNSSS	12	41	PF00415
10	GHVFTWGSGVNGQLGNGKSDG	25	21	PF00415
11	SSRKALKAALAPNPGKPYRVCDSCFLKLKKALD	9	33	Not Found
12	QVDNLRQKCEQQEVELQKSEKKVKEAMTIAAEESAKCKAAKEVIKSLTAQ	9	50	PF13713

## Sheet: Table S4
Table S4. Ka/Ks ratios of segmental duplicated OsRCC1 gene pairs.
Group	Gene pairs	Non_x0002_synonymous substitution rate (Ka)	Synonymous substitution rate (Ks)	Selective pressure ratio (Ka/Ks)
III	OsRCC1-4 & OsRCC1-18	0.101498	0.758657	0.133786
III	OsRCC1-8 & OsRCC1-12	0.112272	0.956103	0.117426
VI	OsRCC1-1 & OsRCC1-19	0.168628	0.885089	0.190521
VI	OsRCC1-5 & OsRCC1-17	0.0788394	0.805658	0.0978572
VI	OsRCC1-6 & OsRCC1-16	0.110041	0.807707	0.136239
VI	OsRCC1-10 & OsRCC1-13	0.29254	1.0567	0.276843

## Sheet: Table S5
Table S5. List of orthologous proteins of OsRCC1s in Arabidopsis, tomato, barley and wheat.
RCC1 (O. sativa)	RCC1 Ortholog	Species
OsRCC1-4	AT3G55580	A. thaliana
OsRCC1-4	AT3G53830
OsRCC1-18	AT3G55580
OsRCC1-18	AT3G53830
OsRCC1-4	Solyc09g011160.4	S. lycopersicum
OsRCC1-4	Solyc05g052950.4
OsRCC1-9	Solyc05g014030.3
OsRCC1-18	Solyc09g011160.4
OsRCC1-1	HORVU.MOREX.r3.1HG0079620	H. vulgare
OsRCC1-2	HORVU.MOREX.r3.3HG0286110
OsRCC1-3	HORVU.MOREX.r3.3HG0293260
OsRCC1-4	HORVU.MOREX.r3.3HG0302120
OsRCC1-5	HORVU.MOREX.r3.1HG0058970
OsRCC1-6	HORVU.MOREX.r3.3HG0325750
OsRCC1-7	HORVU.MOREX.r3.6HG0572980
OsRCC1-8	HORVU.MOREX.r3.2HG0169420
OsRCC1-9	HORVU.MOREX.r3.2HG0176340
OsRCC1-12	HORVU.MOREX.r3.2HG0169420
OsRCC1-13	HORVU.MOREX.r3.2HG0196020
OsRCC1-13	HORVU.MOREX.r3.6HG0604720
OsRCC1-14	HORVU.MOREX.r3.2HG0201180
OsRCC1-15	HORVU.MOREX.r3.2HG0214630
OsRCC1-17	HORVU.MOREX.r3.1HG0058970
OsRCC1-18	HORVU.MOREX.r3.3HG0302120
OsRCC1-19	HORVU.MOREX.r3.1HG0079620
OsRCC1-20	HORVU.MOREX.r3.2HG0150710
OsRCC1-22	HORVU.MOREX.r3.7HG0706130
OsRCC1-24	HORVU.MOREX.r3.5HG0505890
OsRCC1-1	TraesCS1A02G366800	T. aestivum
OsRCC1-1	TraesCS1B02G384600
OsRCC1-1	TraesCS1D02G372300
OsRCC1-2	TraesCS3A02G284800
OsRCC1-2	TraesCS3B02G318700
OsRCC1-2	TraesCS3D02G284600
OsRCC1-3	TraesCS3A02G319000
OsRCC1-3	TraesCS3B02G347100
OsRCC1-3	TraesCS3D02G312300
OsRCC1-4	TraesCS3A02G362800
OsRCC1-4	TraesCS3B02G395200
OsRCC1-4	TraesCS3D02G356500
OsRCC1-5	TraesCS1A02G240600
OsRCC1-5	TraesCS1B02G252700
OsRCC1-5	TraesCS1D02G240700
OsRCC1-6	TraesCS3A02G512900
OsRCC1-6	TraesCS3B02G581600
OsRCC1-6	TraesCS3D02G522600
OsRCC1-7	TraesCS6A02G159700
OsRCC1-7	TraesCS6B02G191600
OsRCC1-7	TraesCS6D02G152800
OsRCC1-8	TraesCS2B02G323100
OsRCC1-9	TraesCS2B02G360200
OsRCC1-9	TraesCS2D02G340500
OsRCC1-10	TraesCS2A02G456700
OsRCC1-10	TraesCS2D02G457000
OsRCC1-10	TraesCS6A02G261000
OsRCC1-10	TraesCS6B02G288400
OsRCC1-10	TraesCS6D02G241800
OsRCC1-13	TraesCS2A02G456700
OsRCC1-13	TraesCS2B02G478900
OsRCC1-13	TraesCS2D02G457000
OsRCC1-13	TraesCS6B02G288400
OsRCC1-13	TraesCS6D02G241800
OsRCC1-14	TraesCS2A02G492400
OsRCC1-14	TraesCS2B02G520600
OsRCC1-14	TraesCS2D02G492700
OsRCC1-15	TraesCS2B02G609200
OsRCC1-15	TraesCS2D02G589800
OsRCC1-16	TraesCS1B02G024400
OsRCC1-17	TraesCS1A02G240600
OsRCC1-17	TraesCS1B02G252700
OsRCC1-17	TraesCS1D02G240700
OsRCC1-18	TraesCS3A02G362800
OsRCC1-18	TraesCS3B02G395200
OsRCC1-18	TraesCS3D02G356500
OsRCC1-19	TraesCS1A02G366800
OsRCC1-19	TraesCS1B02G384600
OsRCC1-19	TraesCS1D02G372300
OsRCC1-20	TraesCS2A02G246100
OsRCC1-20	TraesCS2D02G248500
OsRCC1-22	TraesCS7A02G321600
OsRCC1-22	TraesCS7B02G222500
OsRCC1-22	TraesCS7D02G318600
OsRCC1-24	TraesCS5A02G364400
OsRCC1-24	TraesCS5B02G366300
OsRCC1-24	TraesCS5D02G373300

## Sheet: Table S6
Table S6. Predicted miRNA targeting OsRCC1 mRNAs.
miRNA	Target	Expectation	Target start site	Target end site	miRNA aligned fragment	Inhibition
osa-miR395c	OsRCC1-1	3.5	446	466	GUGAAGUGUUUGGAGGAACUC	Cleavage
osa-miR395x	OsRCC1-1	3.5	446	466	GUGAAGUGUUUGGAGUAGCUC	Cleavage
osa-miR395b	OsRCC1-1	4	446	466	GUGAAGUGUUUGGGGGAACUC	Cleavage
osa-miR395d	OsRCC1-1	4	446	466	GUGAAGUGUUUGGGGGAACUC	Cleavage
osa-miR395e	OsRCC1-1	4	446	466	GUGAAGUGUUUGGGGGAACUC	Cleavage
osa-miR395g	OsRCC1-1	4	446	466	GUGAAGUGUUUGGGGGAACUC	Cleavage
osa-miR395h	OsRCC1-1	4	446	466	GUGAAGUGUUUGGGGGAACUC	Cleavage
osa-miR395i	OsRCC1-1	4	446	466	GUGAAGUGUUUGGGGGAACUC	Cleavage
osa-miR395j	OsRCC1-1	4	446	466	GUGAAGUGUUUGGGGGAACUC	Cleavage
osa-miR395k	OsRCC1-1	4	446	466	GUGAAGUGUUUGGGGGAACUC	Cleavage
osa-miR395l	OsRCC1-1	4	446	466	GUGAAGUGUUUGGGGGAACUC	Cleavage
osa-miR395m	OsRCC1-1	4	446	466	GUGAAGUGUUUGGGGGAACUC	Cleavage
osa-miR395n	OsRCC1-1	4	446	466	GUGAAGUGUUUGGGGGAACUC	Cleavage
osa-miR395p	OsRCC1-1	4	446	466	GUGAAGUGUUUGGGGGAACUC	Cleavage
osa-miR395q	OsRCC1-1	4	446	466	GUGAAGUGUUUGGGGGAACUC	Cleavage
osa-miR395r	OsRCC1-1	4	446	466	GUGAAGUGUUUGGGGGAACUC	Cleavage
osa-miR395s	OsRCC1-1	4	446	466	GUGAAGUGUUUGGGGGAACUC	Cleavage
osa-miR395t	OsRCC1-1	4	446	466	GUGAAGUGUUUGGGGAAACUC	Cleavage
osa-miR395v	OsRCC1-1	4	446	466	GUGAAGUAUUUGGCGGAACUC	Cleavage
osa-miR395w	OsRCC1-1	4	445	466	GUGAAGUGUUUGGGGGAUUCUC	Cleavage
osa-miR395y	OsRCC1-1	4	446	466	GUGAAGUGUUUGGGGGAACUC	Cleavage
osa-miR1857-3p	OsRCC1-1	4.5	1174	1193	UCAUGCUCCAAGAAAACCAGG	Cleavage
osa-miR395o	OsRCC1-1	4.5	446	466	AUGAAGUGUUUGGAGGAACUC	Cleavage
osa-miR166a-3p	OsRCC1-1	5	660	680	UCGGACCAGGCUUCAUUCCCC	Cleavage
osa-miR166b-3p	OsRCC1-1	5	660	680	UCGGACCAGGCUUCAUUCCCC	Cleavage
osa-miR166c-3p	OsRCC1-1	5	660	680	UCGGACCAGGCUUCAUUCCCC	Cleavage
osa-miR166d-3p	OsRCC1-1	5	660	680	UCGGACCAGGCUUCAUUCCCC	Cleavage
osa-miR166f	OsRCC1-1	5	660	680	UCGGACCAGGCUUCAUUCCCC	Cleavage
osa-miR166g-3p	OsRCC1-1	5	660	680	UCGGACCAGGCUUCAUUCCUC	Cleavage
osa-miR166h-3p	OsRCC1-1	5	660	680	UCGGACCAGGCUUCAUUCCUC	Cleavage
osa-miR166j-3p	OsRCC1-1	5	660	680	UCGGACCAGGCUUCAUUCCCC	Cleavage
osa-miR166m	OsRCC1-1	5	660	680	UCGGACCAGGCUUCAUUCCCU	Cleavage
osa-miR1847.1	OsRCC1-1	5	1875	1895	UGCAGUUUGCAGUUGUGGCAC	Cleavage
osa-miR1854-5p	OsRCC1-1	5	1422	1442	UGGUGAAAUUUGUAGAUUGGA	Cleavage
osa-miR2105	OsRCC1-1	5	2756	2775	UUGUGAUGUGAAUGAUUCAU	Cleavage
osa-miR395f	OsRCC1-1	5	446	466	GUGAAUUGUUUGGGGGAACUC	Cleavage
osa-miR3982-5p	OsRCC1-1	5	825	845	GCGCUCCACGUAGGCAACAAU	Cleavage
osa-miR5514	OsRCC1-1	5	605	625	UCCCAGAGCUUUGGCCGUCGC	Cleavage
osa-miR1860-5p	OsRCC1-1	4	112	132	AGAAAACCAGCUUCCAGAUCU	Translation
osa-miR1439	OsRCC1-1	5	497	517	UUUUGGAACGGAGUGAGUAUU	Translation
osa-miR2865	OsRCC1-1	5	2619	2639	CUCAGCAGUCGACUGUACCGUG	Translation
osa-miR815a	OsRCC1-1	5	2319	2338	AAGGGGAUUGAGGAGAUUGGG	Translation
osa-miR815b	OsRCC1-1	5	2319	2338	AAGGGGAUUGAGGAGAUUGGG	Translation
osa-miR815c	OsRCC1-1	5	2319	2338	AAGGGGAUUGAGGAGAUUGGG	Translation
osa-miR5809	OsRCC1-2	3.5	139	158	UCGUCGCCGGCGACCACAGC	Cleavage
osa-miR426	OsRCC1-2	4	1588	1608	UUUUGGAAGUUUGUCCUUACG	Cleavage
osa-miR444d.3	OsRCC1-2	4	1263	1283	UUGUGGCUUUCUUGCAAGUUG	Cleavage
osa-miR444a-3p.2	OsRCC1-2	4.5	1169	1189	UGCAGUUGCUGCCUCAAGCUU	Cleavage
osa-miR444d.2	OsRCC1-2	4.5	1169	1189	UGCAGUUGCUGCCUCAAGCUU	Cleavage
osa-miR444e	OsRCC1-2	4.5	1169	1189	UGCAGUUGCUGCCUCAAGCUU	Cleavage
osa-miR5533	OsRCC1-2	4.5	1163	1183	CUUUGCCAGAAGCCCUCAUGG	Cleavage
osa-miR812s	OsRCC1-2	4.5	292	315	AAGACGGACAAUCAAACGUUGGAC	Cleavage
osa-miR2925	OsRCC1-2	5	169	187	UGGCGGCCGCGGGCUUCGU	Cleavage
osa-miR444f	OsRCC1-2	5	1169	1189	UGCAGUUGUUGCCUCAAGCUU	Cleavage
osa-miR5799	OsRCC1-2	5	292	315	AAGACGAAUAAUCAAACGUUGGAC	Cleavage
osa-miR5809	OsRCC1-2	5	19	38	UCGUCGCCGGCGACCACAGC	Cleavage
osa-miR5809	OsRCC1-2	5	1138	1157	UCGUCGCCGGCGACCACAGC	Cleavage
osa-miR5815	OsRCC1-2	5	1477	1500	AAUGUUAUGGACACUAGAUGACAU	Cleavage
osa-miR820a	OsRCC1-2	5	105	125	UCGGCCUCGUGGAUGGACCAG	Cleavage
osa-miR820b	OsRCC1-2	5	105	125	UCGGCCUCGUGGAUGGACCAG	Cleavage
osa-miR820c	OsRCC1-2	5	105	125	UCGGCCUCGUGGAUGGACCAG	Cleavage
osa-miR1441	OsRCC1-2	5	285	305	ACCGGAUGUCGGAAAAGGUUU	Translation
osa-miR1862f	OsRCC1-3	4	912	931	AUGAGGUUGGUUUAUUUUGG	Cleavage
osa-miR1862g	OsRCC1-3	4	912	931	AUGAGGUUGGUUUAUUUUGG	Cleavage
osa-miR5081	OsRCC1-3	4	338	359	UAAUUUGUAGCAAAUUGAUAGU	Cleavage
osa-miR397a	OsRCC1-3	4.5	654	674	UCAUUGAGUGCAGCGUUGAUG	Cleavage
osa-miR408-3p	OsRCC1-3	4.5	862	882	CUGCACUGCCUCUUCCCUGGC	Cleavage
osa-miR1435	OsRCC1-3	5	1057	1076	UUUCUUAAGUCAAACUUUUU	Cleavage
osa-miR397b	OsRCC1-3	5	654	674	UUAUUGAGUGCAGCGUUGAUG	Cleavage
osa-miR5075	OsRCC1-3	2.5	6	26	UUCUCCGUCGCCGCCGUCCGC	Cleavage
osa-miR408-3p	OsRCC1-3	5	28	48	CUGCACUGCCUCUUCCCUGGC	Cleavage
osa-miR5079a	OsRCC1-4	4	1034	1055	UUUGGAUCUGUUAUUUUGGUAU	Cleavage
osa-miR5079b	OsRCC1-4	4	1034	1055	UUUGGAUCUGUUAUUUUGGUAU	Cleavage
osa-miR5075	OsRCC1-4	4.5	7	27	UUCUCCGUCGCCGCCGUCCGC	Cleavage
osa-miR5487	OsRCC1-4	4.5	1185	1205	AAAGAUGUGCAUGUAGUUCCG	Cleavage
osa-miR2871a-3p	OsRCC1-4	5	742	762	UAUUUUAGUUUCUAUGGUCAC	Cleavage
osa-miR2871b	OsRCC1-4	5	742	762	UAUUUUAGUUUCUAUGGUCAC	Cleavage
osa-miR2873b	OsRCC1-4	5	1109	1129	UUGGACUUGAGAUUUGGUAUG	Cleavage
osa-miR171h	OsRCC1-4	5	403	423	GUGAGCCGAACCAAUAUCACU	Translation
osa-miR414	OsRCC1-5	3.5	756	776	UCAUCCUCAUCAUCAUCGUCC	Cleavage
osa-miR6251	OsRCC1-5	4	1761	1781	UGUGUAGCCACAUUGUAAGGG	Cleavage
osa-miR1880	OsRCC1-5	4.5	989	1012	UUCCAAGCGGGCCACUUAAGCAUU	Cleavage
osa-miR2275a	OsRCC1-5	4.5	89	110	UUUGGUUUCCUCCAAUAUCUCA	Cleavage
osa-miR2275b	OsRCC1-5	4.5	89	110	UUUGGUUUCCUCCAAUAUCUCA	Cleavage
osa-miR435	OsRCC1-5	4.5	620	639	UUAUCCGGUAUUGGAGUUGA	Cleavage
osa-miR1432-3p	OsRCC1-5	5	1134	1154	CAGGUGUCAUCUCCCCUGAAC	Cleavage
osa-miR1441	OsRCC1-5	5	566	586	ACCGGAUGUCGGAAAAGGUUU	Cleavage
osa-miR160a-3p	OsRCC1-5	5	1693	1713	GCGUGCAAGGAGCCAAGCAUG	Cleavage
osa-miR160b-3p	OsRCC1-5	5	1693	1713	GCGUGCAAGGAGCCAAGCAUG	Cleavage
osa-miR160c-3p	OsRCC1-5	5	1693	1713	GCGUGCACGGAGCCAAGCAUA	Cleavage
osa-miR2876-3p	OsRCC1-5	5	782	801	UUCCUAUAUGAACACUGUUGC	Cleavage
osa-miR2931	OsRCC1-5	5	297	316	CUUUAUUGUUGAUGUCAAAA	Cleavage
osa-miR413	OsRCC1-5	5	3035	3055	CUAGUUUCACUUGUUCUGCAC	Cleavage
osa-miR5160	OsRCC1-5	5	1230	1251	CGAGAUCGAUGGUAUAUUUCUG	Cleavage
osa-miR530-5p	OsRCC1-5	5	1808	1827	UGCAUUUGCACCUGCACCUA	Cleavage
osa-miR5484	OsRCC1-5	5	3105	3125	AACCGAGCGCGCUGUUGAUUA	Cleavage
osa-miR5488	OsRCC1-5	5	257	276	UGAAGGCGACUGAUGAUUUCA	Cleavage
osa-miR5544	OsRCC1-5	5	1	21	AGAACACGGAGUAGAAGUUGG	Cleavage
osa-miR6249a	OsRCC1-5	5	1282	1302	CGUGAAGAGCUCGCCGGCGGC	Cleavage
osa-miR6249b	OsRCC1-5	5	1282	1302	CGUGAAGAGCUCGCCGGCGGC	Cleavage
osa-miR2864.1	OsRCC1-5	4	3153	3173	UUUUGCUGCCCUUGUUUUGCA	Translation
osa-miR1862d	OsRCC1-6	3.5	28	51	ACUAGGUUUGUUUAUUUUGGGACG	Cleavage
osa-miR1862e	OsRCC1-6	3.5	27	50	CUAGAUUUGUUUAUUUUGGGACGG	Cleavage
osa-miR2094-5p	OsRCC1-6	3.5	1267	1287	UGGCUGCUAGGCUCCUGGGUG	Cleavage
osa-miR1865-3p	OsRCC1-6	4.5	78	102	CGAAGAAUCGCAGUCA-CUAGUUGU	Cleavage
osa-miR5077	OsRCC1-6	4.5	1683	1701	GUUCGCGUCGGGUUCACCA	Cleavage
osa-miR530-3p	OsRCC1-6	4.5	550	570	AGGUGCAGAGGCAGAUGCAAC	Cleavage
osa-miR1437b-5p	OsRCC1-6	5	1752	1771	GGGAGGAAACAGUGCCUAGUG	Cleavage
osa-miR2871a-3p	OsRCC1-6	5	647	667	UAUUUUAGUUUCUAUGGUCAC	Cleavage
osa-miR2871b	OsRCC1-6	5	647	667	UAUUUUAGUUUCUAUGGUCAC	Cleavage
osa-miR3982-3p	OsRCC1-6	5	1290	1310	AGUUGCCUACAUGGAGCGCCA	Cleavage
osa-miR3982-5p	OsRCC1-6	5	397	417	GCGCUCCACGUAGGCAACAAU	Cleavage
osa-miR444d.3	OsRCC1-6	5	2021	2041	UUGUGGCUUUCUUGCAAGUUG	Cleavage
osa-miR5528	OsRCC1-6	5	942	962	AAGACGGUUUUAGAUGUUGCC	Cleavage
osa-miR5794	OsRCC1-6	5	83	102	UGAGGAAUCACUAGUAGUCGU	Cleavage
osa-miR5155	OsRCC1-6	4.5	15	38	ACUUUAAUACCAUUGGAAGAUUGC	Translation
osa-miR5508	OsRCC1-6	5	599	619	UAGAUGGCUGAUCUGGUGUGG	Translation
osa-miR5812	OsRCC1-6	5	382	405	AGCAACGAUUUUAAGAUUGUGGCA	Translation
osa-miR3980a-3p	OsRCC1-7	4.5	1125	1145	CUGGCCGAGGCCGUCGAUUCU	Cleavage
osa-miR3980b-3p	OsRCC1-7	4.5	1125	1145	CUGGCCGAGGCCGUCGAUUCU	Cleavage
osa-miR2925	OsRCC1-7	5	196	214	UGGCGGCCGCGGGCUUCGU	Cleavage
osa-miR5143a	OsRCC1-7	5	522	545	UGUGGUAUGUUGGCAAUGUAGGAA	Cleavage
osa-miR5143b	OsRCC1-7	5	522	545	UGUGGUAUGUUGGCAAUGUAGGAA	Cleavage
osa-miR5809	OsRCC1-8	2.5	28	47	UCGUCGCCGGCGACCACAGC	Cleavage
osa-miR5074	OsRCC1-8	5	205	225	GAAGGCCACCGUCGGGAUCGC	Cleavage
osa-miR5832	OsRCC1-8	5	426	446	UUGGCGGAGCGGUUGCUGUCA	Cleavage
osa-miR5820	OsRCC1-9	2.5	1644	1664	UGGCAGAGAUUGAUCGAGGAA	Cleavage
osa-miR1860-5p	OsRCC1-9	4.5	442	463	AGAAAACCAGCUUCC-AGAUCU	Cleavage
osa-miR5487	OsRCC1-9	4.5	285	305	AAAGAUGUGCAUGUAGUUCCG	Cleavage
osa-miR2094-3p	OsRCC1-9	5	1154	1176	CAGAGCUGUGGCAU-CCACGUCG	Cleavage
osa-miR1428b	OsRCC1-10	4	475	495	UAAGAUAAUGCCAUGAAUUCG	Cleavage
osa-miR1428c	OsRCC1-10	4	475	495	UAAGAUAAUGCCAUGAAUUCG	Cleavage
osa-miR1428d	OsRCC1-10	4	475	495	UAAGAUAAUGCCAUGAAUUCG	Cleavage
osa-miR1428e-3p	OsRCC1-10	4	475	495	UAAGAUAAUGCCAUGAAUUUG	Cleavage
osa-miR6249a	OsRCC1-10	4	931	951	CGUGAAGAGCUCGCCGGCGGC	Cleavage
osa-miR6249b	OsRCC1-10	4	931	951	CGUGAAGAGCUCGCCGGCGGC	Cleavage
osa-miR1857-3p	OsRCC1-10	4.5	967	986	UCAUGCUCCAAGAAAACCAGG	Cleavage
osa-miR2874	OsRCC1-10	5	1115	1138	AUGUGAACAGUGUCAAACAGUGUC	Cleavage
osa-miR5499	OsRCC1-10	5	245	265	GAAGGAAGAAUCGUUAUGGAA	Cleavage
osa-miR172b	OsRCC1-10	4.5	1701	1721	GGAAUCUUGAUGAUGCUGCAU	Translation
osa-miR5079a	OsRCC1-10	4.5	1816	1837	UUUGGAUCUGUUAUUUUGGUAU	Translation
osa-miR5079b	OsRCC1-10	4.5	1816	1837	UUUGGAUCUGUUAUUUUGGUAU	Translation
osa-miR5510	OsRCC1-10	4.5	2791	2811	AGGCUGAUCCACUCCAGAGGA	Translation
osa-miR1882a	OsRCC1-10	5	216	239	AGAUUGCUUUCAAGGUCAUUUCUU	Translation
osa-miR1882b	OsRCC1-10	5	216	239	AGAUUGCUUUCAAGGUCAUUUCUU	Translation
osa-miR1882c	OsRCC1-10	5	216	239	AGAUUGCUUUCAAGGUCAUUUCUU	Translation
osa-miR1882d	OsRCC1-10	5	216	239	AGAUUGCUUUCAAGGUCAUUUCUU	Translation
osa-miR1882e-5p	OsRCC1-10	5	216	239	AGAUUGCUUUCAAGGUCAUUUCUU	Translation
osa-miR1882f	OsRCC1-10	5	216	239	AGAUUGCUUUCAAGGUCAUUUCUU	Translation
osa-miR1882g	OsRCC1-10	5	216	239	AGAUUGCUUUCAAGGUCAUUUCUU	Translation
osa-miR1882h	OsRCC1-10	5	216	239	AGAUUGCUUUCAAGGUCAUUUCUU	Translation
osa-miR159a.1	OsRCC1-11	4.5	778	798	UUUGGAUUGAAGGGAGCUCUG	Cleavage
osa-miR159b	OsRCC1-11	4.5	778	798	UUUGGAUUGAAGGGAGCUCUG	Cleavage
osa-miR169r-3p	OsRCC1-11	4.5	1181	1201	UGGCAAGUCUCCUCGGCUACC	Cleavage
osa-miR2918	OsRCC1-11	4.5	84	104	AUCCGUGUUGUCUGCGCUUUA	Cleavage
osa-miR5794	OsRCC1-11	4.5	1321	1341	UGAGGAAUCACUAGUAGUCGU	Cleavage
osa-miR1857-5p	OsRCC1-11	5	1234	1254	UGGUUUUUUUGGAGCAUGAGG	Cleavage
osa-miR816	OsRCC1-11	5	1297	1316	GUGACAUAUUUUACUACAAC	Cleavage
osa-miR3979-5p	OsRCC1-12	4	681	700	UCUCUCUCUCCCUUGAAGGC	Cleavage
osa-miR1871	OsRCC1-12	4.5	1172	1195	AUGGCUCUGAUAUCAUGUUGGUUU	Cleavage
osa-miR2930	OsRCC1-12	5	131	152	UUCUCUUCUCUCGCGCGUGGCC	Cleavage
osa-miR426	OsRCC1-12	5	984	1005	UUUUGGAAGUUUGUCCU-UACG	Cleavage
osa-miR444b.1	OsRCC1-12	5	395	415	UGUUGUCUCAAGCUUGCUGCC	Cleavage
osa-miR444c.1	OsRCC1-12	5	395	415	UGUUGUCUCAAGCUUGCUGCC	Cleavage
osa-miR2118o	OsRCC1-12	4.5	302	323	CUCCUGAUGCCUCCCAAGCCUA	Translation
osa-miR396a-5p	OsRCC1-13	3.5	2008	2028	UUCCACAGCUUUCUUGAACUG	Cleavage
osa-miR396b-5p	OsRCC1-13	3.5	2008	2028	UUCCACAGCUUUCUUGAACUG	Cleavage
osa-miR396c-5p	OsRCC1-13	3.5	2008	2028	UUCCACAGCUUUCUUGAACUU	Cleavage
osa-miR5543	OsRCC1-13	4	2812	2832	UAUGAAUGGUAUAUUUUCUUG	Cleavage
osa-miR1857-3p	OsRCC1-13	4.5	1192	1211	UCAUGCUCCAAGAAAACCAGG	Cleavage
osa-miR2873a	OsRCC1-13	4.5	2029	2052	AAGUUUGGACUUAAAUUUGGUAAC	Cleavage
osa-miR319a-5p	OsRCC1-13	4.5	2323	2343	AGCUGCCGAAUCAUCCAUUCA	Cleavage
osa-miR1426	OsRCC1-13	5	2562	2582	AGAAUCUUGAUGAUGAUUAAA	Cleavage
osa-miR171f-5p	OsRCC1-13	5	1382	1402	UGUUGGCAUGGUUCAAUCAAA	Cleavage
osa-miR1862e	OsRCC1-13	5	2025	2048	CUAGAUUUGUUUAUUUUGGGACGG	Cleavage
osa-miR413	OsRCC1-13	5	2414	2434	CUAGUUUCACUUGUUCUGCAC	Cleavage
osa-miR5149	OsRCC1-13	5	2100	2121	GAGGAGCUGUGACGAUUUGGGA	Cleavage
osa-miR171f-5p	OsRCC1-13	4.5	13	33	UGUUGGCAUGGUUCAAUCAAA	Translation
osa-miR2864.1	OsRCC1-13	4.5	2457	2477	UUUUGCUGCCCUUGUUUUGCA	Translation
osa-miR1436	OsRCC1-13	5	2892	2912	ACAUUAUGGGACGGAGGGAGU	Translation
osa-miR1862f	OsRCC1-13	5	2420	2439	AUGAGGUUGGUUUAUUUUGG	Translation
osa-miR1862g	OsRCC1-13	5	2420	2439	AUGAGGUUGGUUUAUUUUGG	Translation
osa-miR5146	OsRCC1-13	5	248	271	UUUAACUAAUGAACCGGCACCUAU	Translation
osa-miR529b	OsRCC1-13	5	2298	2318	AGAAGAGAGAGAGUACAGCUU	Translation
osa-miR5338	OsRCC1-13	5	1398	1418	UGAAGCUUCAGUUGGUUGUAU	Translation
osa-miR414	OsRCC1-14	3.5	1407	1427	UCAUCCUCAUCAUCAUCGUCC	Cleavage
osa-miR168a-3p	OsRCC1-14	4	1597	1620	GAUCCCGCCUUGCACCAAGUGAAU	Cleavage
osa-miR5507	OsRCC1-14	4	417	437	AAUGAGAAUGAUGACCCGGUG	Cleavage
osa-miR1857-5p	OsRCC1-14	4.5	707	727	UGGUUUUUUUGGAGCAUGAGG	Cleavage
osa-miR408-5p	OsRCC1-14	4.5	500	520	CAGGGAUGAGGCAGAGCAUGG	Cleavage
osa-miR156c-3p	OsRCC1-14	5	1613	1634	GCUCACUUCUCUCUCUGUCAGC	Cleavage
osa-miR156g-3p	OsRCC1-14	5	1613	1634	GCUCACUUCUCUCUCUGUCAGC	Cleavage
osa-miR2930	OsRCC1-14	5	36	56	UUCUCUUCUCUCGCGCGUGGCC	Cleavage
osa-miR5833	OsRCC1-14	5	9	29	UCCUCCUCGGGCUCAUCGGGC	Cleavage
osa-miR1319a	OsRCC1-14	5	1184	1207	AACCGGCAUCUGUAAUAUAUUAUA	Translation
osa-miR1432-5p	OsRCC1-15	4	2611	2631	AUCAGGAGAGAUGACACCGAC	Cleavage
osa-miR444a-3p.1	OsRCC1-15	4	2392	2412	UUGCUGCCUCAAGCUUGCUGC	Cleavage
osa-miR444d.1	OsRCC1-15	4	2392	2412	UUGCUGCCUCAAGCUUGCUGC	Cleavage
osa-miR6252	OsRCC1-15	4	443	465	AUUCGUUGUAUUAAGAGAGGGUU	Cleavage
osa-miR530-5p	OsRCC1-15	4.5	1670	1689	UGCAUUUGCACCUGCACCUA	Cleavage
osa-miR167e-3p	OsRCC1-15	5	2400	2420	AGAUCAUGUUGCAGCUUCACU	Cleavage
osa-miR167i-3p	OsRCC1-15	5	2400	2420	AGAUCAUGUUGCAGCUUCACU	Cleavage
osa-miR172d-5p	OsRCC1-15	5	1582	1601	GCAGCACCAUCAAGAUUCAC	Cleavage
osa-miR2106	OsRCC1-15	5	2313	2333	CCGAGGUUUUCUGGAUACAUU	Cleavage
osa-miR2867-5p	OsRCC1-15	5	1811	1832	UGUGCCAUCCCACACAUCCCGA	Cleavage
osa-miR395v	OsRCC1-15	5	1319	1339	GUGAAGUAUUUGGCGGAACUC	Cleavage
osa-miR5500	OsRCC1-15	5	3143	3164	AUCACUGAUGAAAUCUUGCGGC	Cleavage
osa-miR5510	OsRCC1-15	5	1816	1836	AGGCUGAUCCACUCCAGAGGA	Cleavage
osa-miR2092-5p	OsRCC1-15	4	2681	2701	CAACUGAAGUCGGUGUUUACU	Translation
osa-miR2875	OsRCC1-15	4.5	1881	1903	AUUUACAGUCAUAUACAGUUUAUA	Translation
osa-miR2864.1	OsRCC1-15	5	2491	2511	UUUUGCUGCCCUUGUUUUGCA	Translation
osa-miR5529	OsRCC1-15	5	1812	1831	GUUUCAUCCAUGGACACCGCA	Translation
osa-miR2928	OsRCC1-16	4	2706	2725	AAGAAGACGACAUUUUGUUG	Cleavage
osa-miR172c	OsRCC1-16	4.5	2492	2512	UGAAUCUUGAUGAUGCUGCAC	Cleavage
osa-miR395w	OsRCC1-16	4.5	655	676	GUGAAGUGUUUGGGGGAUUCUC	Cleavage
osa-miR5528	OsRCC1-16	4.5	1542	1562	AAGACGGUUUUAGAUGUUGCC	Cleavage
osa-miR1865-3p	OsRCC1-16	5	78	102	CGAAGAAUCGCAGUCA-CUAGUUGU	Cleavage
osa-miR2864.1	OsRCC1-16	5	1605	1625	UUUUGCUGCCCUUGUUUUGCA	Cleavage
osa-miR6253	OsRCC1-16	5	550	571	GAGGAAAGUGGGCAGUUGGGUU	Cleavage
osa-miR6255	OsRCC1-16	5	551	572	UGGGAAAAAUGGGCAGUUGAGU	Cleavage
osa-miR812o-5p	OsRCC1-16	5	949	969	CGUGUUCAACGUUUGACUGUC	Cleavage
osa-miR2863c	OsRCC1-16	5	348	371	UUAGUAGGACUAGAAUGGGCCAAA	Translation
osa-miR5822	OsRCC1-17	4	49	69	UGUCUGCUCGAUGUCAGGUUG	Cleavage
osa-miR1319a	OsRCC1-17	4.5	1989	2012	AACCGGCAUCUGUAAUAUAUUAUA	Cleavage
osa-miR1858a	OsRCC1-17	4.5	475	495	GAGAGGAGGACGGAGUGGGGC	Cleavage
osa-miR1858b	OsRCC1-17	4.5	475	495	GAGAGGAGGACGGAGUGGGGC	Cleavage
osa-miR1437b-3p	OsRCC1-17	5	9	32	GUGCUGGCGAGCUCCGGUGCCGCA	Cleavage
osa-miR1850.3	OsRCC1-17	5	2387	2408	CUGUUUAGUUCACAUCAAUCUU	Cleavage
osa-miR2867-3p	OsRCC1-17	5	1984	2003	CCAGGACGUGUGGGAUGGCA	Cleavage
osa-miR414	OsRCC1-17	5	774	794	UCAUCCUCAUCAUCAUCGUCC	Cleavage
osa-miR5145	OsRCC1-17	5	3027	3050	ACCUGUUUGGAUUCUUGAGGGCUA	Cleavage
osa-miR2864.1	OsRCC1-17	3.5	3156	3176	UUUUGCUGCCCUUGUUUUGCA	Translation
osa-miR5510	OsRCC1-17	3.5	1972	1992	AGGCUGAUCCACUCCAGAGGA	Translation
osa-miR2103	OsRCC1-17	5	102	123	UUUCCCUCUCCGUGCGCGCUCG	Translation
osa-miR395w	OsRCC1-18	4	1405	1426	GUGAAGUGUUUGGGGGAUUCUC	Cleavage
osa-miR5145	OsRCC1-18	4	802	825	ACCUGUUUGGAUUCUUGAGGGCUA	Cleavage
osa-miR2118l	OsRCC1-18	4.5	255	276	UUCCUAAUGCUUCCCAUUCCUA	Cleavage
osa-miR5511	OsRCC1-18	4.5	1101	1121	CAUAUCCCAGCUGUUUCGGCC	Cleavage
osa-miR167a-5p	OsRCC1-18	5	729	750	UGAAGCUGCCAGCA-UGAUCUA	Cleavage
osa-miR167b	OsRCC1-18	5	729	750	UGAAGCUGCCAGCA-UGAUCUA	Cleavage
osa-miR167c-5p	OsRCC1-18	5	729	750	UGAAGCUGCCAGCA-UGAUCUA	Cleavage
osa-miR167d-5p	OsRCC1-18	5	729	750	UGAAGCUGCCAGCA-UGAUCUG	Cleavage
osa-miR167e-5p	OsRCC1-18	5	729	750	UGAAGCUGCCAGCA-UGAUCUG	Cleavage
osa-miR167f	OsRCC1-18	5	729	750	UGAAGCUGCCAGCA-UGAUCUG	Cleavage
osa-miR167g	OsRCC1-18	5	729	750	UGAAGCUGCCAGCA-UGAUCUG	Cleavage
osa-miR167h-5p	OsRCC1-18	5	729	750	UGAAGCUGCCAGCA-UGAUCUG	Cleavage
osa-miR167i-5p	OsRCC1-18	5	729	750	UGAAGCUGCCAGCA-UGAUCUG	Cleavage
osa-miR167j	OsRCC1-18	5	729	750	UGAAGCUGCCAGCA-UGAUCUG	Cleavage
osa-miR2097-3p	OsRCC1-18	5	13	34	UUCUCUUCUUCGUGUCGCAUUU	Cleavage
osa-miR2275d	OsRCC1-18	5	775	796	CUUGUUUUUCUCCAAUAUCUCA	Cleavage
osa-miR5079a	OsRCC1-18	5	971	992	UUUGGAUCUGUUAUUUUGGUAU	Cleavage
osa-miR5079b	OsRCC1-18	5	971	992	UUUGGAUCUGUUAUUUUGGUAU	Cleavage
osa-miR5514	OsRCC1-18	5	563	583	UCCCAGAGCUUUGGCCGUCGC	Cleavage
osa-miR827	OsRCC1-18	5	1136	1156	UUAGAUGACCAUCAGCAAACA	Cleavage
osa-miR1442	OsRCC1-18	5	428	447	AUUCAUAGUACUAGAUGUGU	Translation
osa-miR2864.2	OsRCC1-19	4	1554	1574	UUGUUUUGCAUUGUAUAGGUA	Cleavage
osa-miR444a-5p	OsRCC1-19	4	1468	1488	GCUAGAGGUGGCAACUGCAUA	Cleavage
osa-miR166i-5p	OsRCC1-19	4.5	523	543	AAUGCAGUUUGAUCCAAGAUC	Cleavage
osa-miR160a-5p	OsRCC1-19	5	2621	2641	UGCCUGGCUCCCUGUAUGCCA	Cleavage
osa-miR160b-5p	OsRCC1-19	5	2621	2641	UGCCUGGCUCCCUGUAUGCCA	Cleavage
osa-miR160c-5p	OsRCC1-19	5	2621	2641	UGCCUGGCUCCCUGUAUGCCA	Cleavage
osa-miR160d-5p	OsRCC1-19	5	2621	2641	UGCCUGGCUCCCUGUAUGCCA	Cleavage
osa-miR160e-5p	OsRCC1-19	5	2621	2641	UGCCUGGCUCCCUGUAUGCCG	Cleavage
osa-miR2090	OsRCC1-19	5	740	762	AAC-UCUGAUUCUAGAAUUUUUG	Cleavage
osa-miR2092-3p	OsRCC1-19	5	1664	1685	ACCAGCAUUCCAUUGGCAGAGG	Cleavage
osa-miR2879	OsRCC1-19	5	463	486	GCCAGAUGUGUUAAAAUAAUGACC	Cleavage
osa-miR2931	OsRCC1-19	5	2058	2077	CUUUAUUGUUGAUGUCAAAA	Cleavage
osa-miR398a	OsRCC1-19	5	1439	1459	UGUGUUCUCAGGUCACCCCUU	Cleavage
osa-miR399h	OsRCC1-19	5	1924	1944	UGCCAAAGGAGACUUGCCCAG	Cleavage
osa-miR417	OsRCC1-19	5	492	512	GAAUGUAGUGAAUUUGUUCCA	Cleavage
osa-miR5079a	OsRCC1-19	5	2784	2805	UUUGGAUCUGUUAUUUUGGUAU	Cleavage
osa-miR5079b	OsRCC1-19	5	2784	2805	UUUGGAUCUGUUAUUUUGGUAU	Cleavage
osa-miR426	OsRCC1-20	4	2230	2250	UUUUGGAAGUUUGUCCUUACG	Cleavage
osa-miR396a-3p	OsRCC1-20	4.5	125	144	GUUCAAUAAAGCUGUGGGAA	Cleavage
osa-miR396b-3p	OsRCC1-20	4.5	125	144	GUUCAAUAAAGCUGUGGGAA	Cleavage
osa-miR444b.2	OsRCC1-20	5	2209	2229	UGCAGUUGUUGUCUCAAGCUU	Cleavage
osa-miR444c.2	OsRCC1-20	5	2209	2229	UGCAGUUGUUGUCUCAAGCUU	Cleavage
osa-miR444d.3	OsRCC1-20	5	1553	1573	UUGUGGCUUUCUUGCAAGUUG	Cleavage
osa-miR444f	OsRCC1-20	5	2209	2229	UGCAGUUGUUGCCUCAAGCUU	Cleavage
osa-miR5788	OsRCC1-20	5	974	994	UGGAUGUGACAUACUCUAGUA	Cleavage
osa-miR5816	OsRCC1-20	5	53	76	UAGGAGUGUUUGUAGGAGCGCCAC	Cleavage
osa-miR2096-3p	OsRCC1-20	4	390	410	CCUGAGGGGAAAUCGGCGGGA	Translation
osa-miR1320-3p	OsRCC1-20	5	1726	1746	UGUAAAAUUCAUUCGUUCCAA	Translation
osa-miR166i-5p	OsRCC1-20	5	994	1014	AAUGCAGUUUGAUCCAAGAUC	Translation
osa-miR2864.2	OsRCC1-20	5	2520	2540	UUGUUUUGCAUUGUAUAGGUA	Translation
osa-miR5161	OsRCC1-20	5	244	263	UCUGGAUCAGAGGGAGUAUA	Translation
osa-miR5488	OsRCC1-20	5	1924	1943	UGAAGGCGACUGAUGAUUUCA	Translation
osa-miR414	OsRCC1-21	3.5	1041	1061	UCAUCCUCAUCAUCAUCGUCC	Cleavage
osa-miR5831	OsRCC1-21	4	638	661	UAGUCAAACUUAGAAUAGUUGGAC	Cleavage
osa-miR2094-3p	OsRCC1-21	5	969	990	CAGAGCUGUGGCAUCCACGUCG	Cleavage
osa-miR2927	OsRCC1-22	3	654	676	UGUCGUCGUCGAUGGAGCCCAUG	Cleavage
osa-miR5832	OsRCC1-22	4	981	1001	UUGGCGGAGCGGUUGCUGUCA	Cleavage
osa-miR1848	OsRCC1-22	4.5	650	670	CCUCGCCGGCGCGCGCGUGCA	Cleavage
osa-miR5792	OsRCC1-22	4.5	1911	1934	GAUGACAGCGGUGGUUCGGACAUC	Cleavage
osa-miR1437a	OsRCC1-22	5	787	808	UCCGGCGCCGCACUAGGCACUG	Cleavage
osa-miR156j-3p	OsRCC1-22	5	1042	1063	GCUCGCUCCUCUUUCUGUCAGC	Cleavage
osa-miR1846a-5p	OsRCC1-22	5	871	891	AGUGAGGAGGCCGGGGCCGCU	Cleavage
osa-miR1846b-5p	OsRCC1-22	5	871	891	AGUGAGGAGGCCGGGGCCGCU	Cleavage
osa-miR1846c-5p	OsRCC1-22	5	871	891	AGUGAGGAGGCCGGGGCCGCU	Cleavage
osa-miR1847.1	OsRCC1-22	5	1074	1094	UGCAGUUUGCAGUUGUGGCAC	Cleavage
osa-miR2925	OsRCC1-22	5	595	613	UGGCGGCCGCGGGCUUCGU	Cleavage
osa-miR2926	OsRCC1-22	5	424	443	AGGUCGUCGACGUUGGUGCU	Cleavage
osa-miR2927	OsRCC1-22	5	768	790	UGUCGUCGUCGAUGGAGCCCAUG	Cleavage
osa-miR5082	OsRCC1-22	5	43	66	UGCGAUGAUGGCCGCGCGGGUUCA	Cleavage
osa-miR5487	OsRCC1-22	5	2050	2070	AAAGAUGUGCAUGUAGUUCCG	Cleavage
osa-miR166h-5p	OsRCC1-22	5	1860	1880	GGAAUGUUGGCUGGCUCGAGG	Translation
osa-miR5075	OsRCC1-22	5	1986	2006	UUCUCCGUCGCCGCCGUCCGC	Translation
osa-miR818f	OsRCC1-22	5	1863	1883	GGGAGCAUGUAGGAUGGCCAU	Translation
osa-miR5082	OsRCC1-23	4	22	45	UGCGAUGAUGGCCGCGCGGGUUCA	Cleavage
osa-miR2876-5p	OsRCC1-23	5	773	793	AAUUGCUGGCAGCACUGUUUA	Cleavage
osa-miR5146	OsRCC1-23	5	754	777	UUUAACUAAUGAACCGGCACCUAU	Cleavage
osa-miR528-3p	OsRCC1-23	4.5	835	855	CCUGUGCUUGCCUCUUCCAUU	Translation
osa-miR2926	OsRCC1-23	5	1084	1103	AGGUCGUCGACGUUGGUGCU	Translation
osa-miR6249a	OsRCC1-23	5	181	201	CGUGAAGAGCUCGCCGGCGGC	Translation
osa-miR6249b	OsRCC1-23	5	181	201	CGUGAAGAGCUCGCCGGCGGC	Translation
osa-miR396f-5p	OsRCC1-24	4	1067	1088	UCUCCACAGGCUUUCUUGAACU	Cleavage
osa-miR2927	OsRCC1-24	4.5	309	331	UGUCGUCGUCGAUGGAGCCCAUG	Cleavage
osa-miR528-5p	OsRCC1-24	4.5	710	730	UGGAAGGGGCAUGCAGAGGAG	Cleavage
osa-miR2097-5p	OsRCC1-24	5	1233	1254	AGAGAUGGGACGGGCAGGGAAG	Cleavage
osa-miR5536	OsRCC1-24	5	1236	1257	AAUGGUAGUGACAUUAUGGUAG	Cleavage
osa-miR5809	OsRCC1-24	5	310	329	UCGUCGCCGGCGACCACAGC	Cleavage
osa-miR6249a	OsRCC1-24	5	625	645	CGUGAAGAGCUCGCCGGCGGC	Cleavage
osa-miR6249b	OsRCC1-24	5	625	645	CGUGAAGAGCUCGCCGGCGGC	Cleavage
osa-miR528-5p	OsRCC1-25	4	165	185	UGGAAGGGGCAUGCAGAGGAG	Cleavage
osa-miR2927	OsRCC1-25	4.5	192	214	UGUCGUCGUCGAUGGAGCCCAUG	Cleavage
osa-miR396a-5p	OsRCC1-25	4.5	418	438	UUCCACAGCUUUCUUGAACUG	Cleavage
osa-miR396b-5p	OsRCC1-25	4.5	418	438	UUCCACAGCUUUCUUGAACUG	Cleavage
osa-miR396c-5p	OsRCC1-25	4.5	418	438	UUCCACAGCUUUCUUGAACUU	Cleavage
osa-miR1858a	OsRCC1-25	4.5	246	266	GAGAGGAGGACGGAGUGGGGC	Translation
osa-miR1858b	OsRCC1-25	4.5	246	266	GAGAGGAGGACGGAGUGGGGC	Translation
osa-miR2926	OsRCC1-25	4.5	202	221	AGGUCGUCGACGUUGGUGCU	Translation
osa-miR5543	OsRCC1-25	5	760	780	UAUGAAUGGUAUAUUUUCUUG	Translation
osa-miR1860-5p	OsRCC1-26	4.5	383	403	AGAAAACCAGCUUCCAGAUCU	Cleavage
osa-miR3982-3p	OsRCC1-26	5	1244	1263	AGUUGCCUACAUGGAGCGCCA	Cleavage
osa-miR5539a	OsRCC1-26	4.5	811	832	AAGAAAACGGAUGCGCGUGCUA	Translation
osa-miR5539b	OsRCC1-26	4.5	811	832	AAGAAAACGGAUGCGCGUGCUA	Translation

## Sheet: Table S7
Table S7. The GO annotation and enrichment results of OsRCC1s.
GO term	Ontology	Description	Number in input list	Genes In GO term	Number in BG/Ref	p-value	FDR
GO:0008270	Molecular Function	zinc ion binding	9	OsRCC1-1、OsRCC1-5、OsRCC1-6、OsRCC1-10、OsRCC1-13、OsRCC1-15、OsRCC1-16、OsRCC1-17、OsRCC1-19	3939	7.2e-07	1.1e-05
GO:0046914	Molecular Function	transition metal ion binding	9	OsRCC1-1、OsRCC1-5、OsRCC1-6、OsRCC1-10、OsRCC1-13、OsRCC1-15、OsRCC1-16、OsRCC1-17、OsRCC1-19	4875	4.7e-06	3.5e-05
GO:0043169	Molecular Function	cation binding	9	OsRCC1-1、OsRCC1-5、OsRCC1-6、OsRCC1-10、OsRCC1-13、OsRCC1-15、OsRCC1-16、OsRCC1-17、OsRCC1-19	5696	1.8e-05	5.4e-05
GO:0043167	Molecular Function	ion binding	9	OsRCC1-1、OsRCC1-5、OsRCC1-6、OsRCC1-10、OsRCC1-13、OsRCC1-15、OsRCC1-16、OsRCC1-17、OsRCC1-19	5700	1.8e-05	5.4e-05
GO:0046872	Molecular Function	metal ion binding	9	OsRCC1-1、OsRCC1-5、OsRCC1-6、OsRCC1-10、OsRCC1-13、OsRCC1-15、OsRCC1-16、OsRCC1-17、OsRCC1-19	5476	1.3e-05	5.4e-05
GO:0005488	Molecular Function	binding	10	OsRCC1-1、OsRCC1-5、OsRCC1-6、OsRCC1-10、OsRCC1-13、OsRCC1-15、OsRCC1-16、OsRCC1-17、OsRCC1-19、OsRCC1-22	16823	0.028	0.068
